# Supplementary material for: Axially diethylaminophenoxypropanoxy substituted new subphthalocyanines: synthesis and electropolymerization properties
Source: Royal Society of Chemistry journal article supplement (doi:10.1039/c5dt05072c), 2016-01-01
Supplement: c5dt05072c1.pdf [file c5dt05072c1.pdf]

## SUPPLEMENTARY INFORMATION

### **Axially Diethylaminophenoxypropanoxy Substituted New Subphthalocyanines: Synthesis and Electropolymerization properties**

Zekeriya Biyiklioglu\*, Hakan Alp

*Department of Chemistry, Faculty of Science, Karadeniz Technical University, 61080  
Trabzon, Turkey*

### **1.1. Materials**

1,3-Bis[3-(diethylamino)phenoxy]propan-2-ol **2** [1] and 2,3-bis[3-(diethylamino)phenoxy]propan-1-ol **4** [2] were prepared according to the literature. Boron subphthalocyanine chloride **1** was purchased from Aldrich. All reagents and solvents were of reagent grade quality and were obtained from commercial suppliers. All solvents were dried and purified as described by Perrin and Armarego [3].

### **1.2. Equipment**

The IR spectra were recorded on a Perkin Elmer 1600 FT-IR Spectrophotometer, using KBr pellets.  $^1\text{H}$  and  $^{13}\text{C}$ -NMR spectra were recorded on a Bruker Ascend 400 MHz spectrometer in  $\text{CDCl}_3$ , and chemical shifts were reported ( $\delta$ ) relative to  $\text{Me}_4\text{Si}$  as internal standard. Mass spectra were measured on a Micromass Quatro LC/ULTIMA LC-MS/MS spectrometer and MALDI-MS of complexes were obtained in dihydroxybenzoic acid as MALDI matrix using nitrogen laser accumulating 50 laser shots using Bruker Microflex LT MALDI-TOF mass spectrometer. Optical spectra in the UV-vis region were recorded with a Perkin Elmer Lambda 25 spectrophotometer.

### **1.3. Electrochemical measurements**

The cyclic voltammetry (CV) and square wave voltammetry (SWV) measurements were carried out with Gamry Interface 1000 potentiostat/galvanostat controlled by an external Pc and utilizing a three-electrode configuration at  $25^\circ\text{C}$ . The working electrode was a Pt disc with a surface area of  $0.071\text{ cm}^2$ . A Pt wire served as the counter electrode. Saturated calomel electrode (SCE) was employed as the reference electrode and separated from the bulk of the

solution by a double bridge. Electrochemical grade TBAP in extra pure DCM was employed as the supporting electrolyte at a concentration of 0.10 mol dm<sup>-3</sup>.

## References

- [1] I. Acar, V. Çakır, Z. Biyiklioglu, H. Kantekin, *Synth. Met.* 2012, 162, 1546.
- [2] Z. Biyiklioglu, D. Çakır, *Dyes Pigm.* 2014, **100**, 150.
- [3] D.D. Perrin, W.L.F. Armarego, *Purification of Laboratory Chemicals* (2nd edn), Pergamon Press: Oxford, 1989.
